# Supplementary material
Source: publisher figshare collection journal article supplement (https://frontiersin.figshare.com/ndownloader/files/26179685)
Supplement: Supplementary file 1 [file 26179685]

**Original image of the article**

**Figure 4**

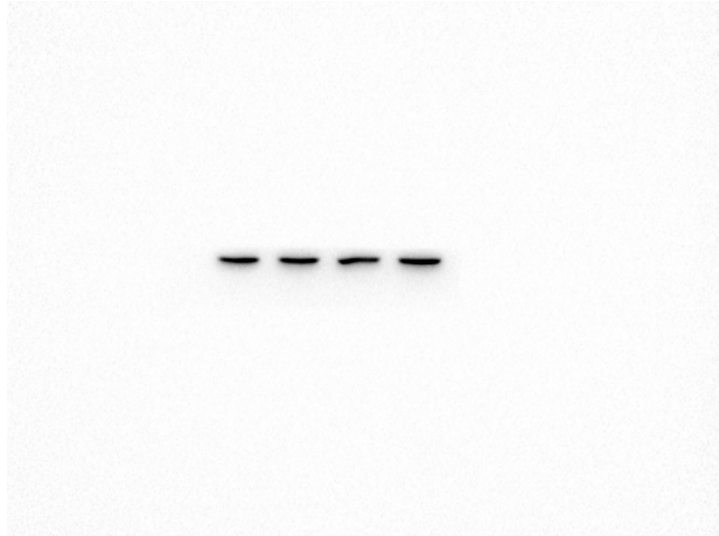

Figure 4A. GADPH protein expression

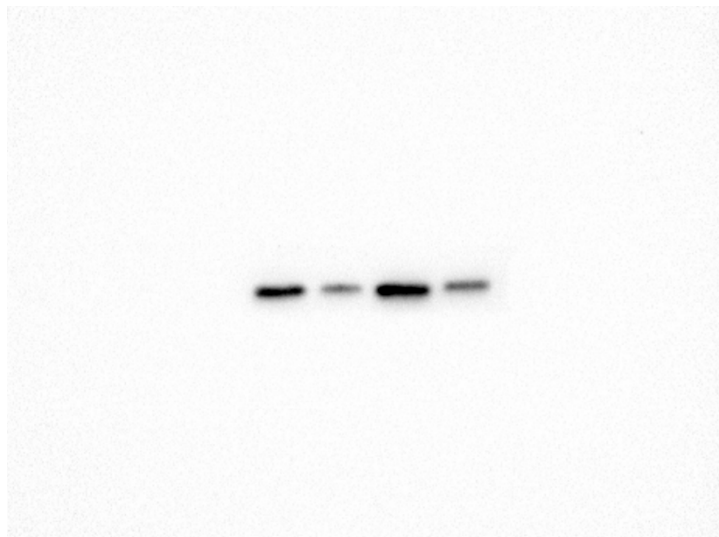

Figure 4A. survivin protein expression

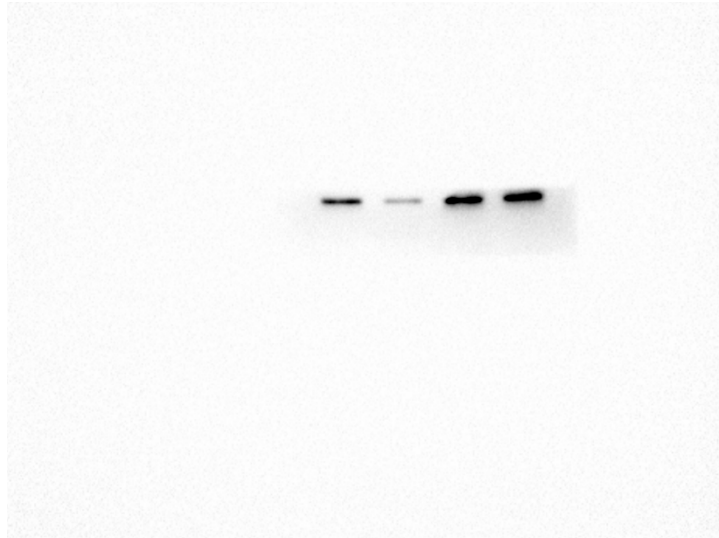

Figure 4A. STAT3 protein expression

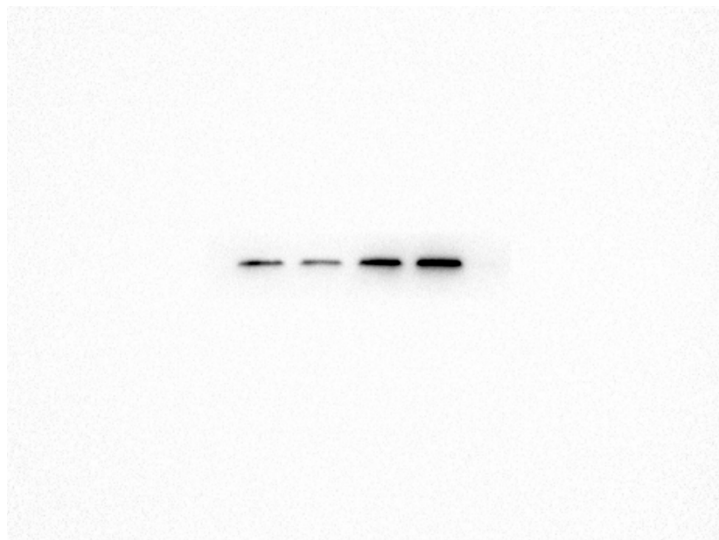

Figure 4A. p-STAT3 protein expression

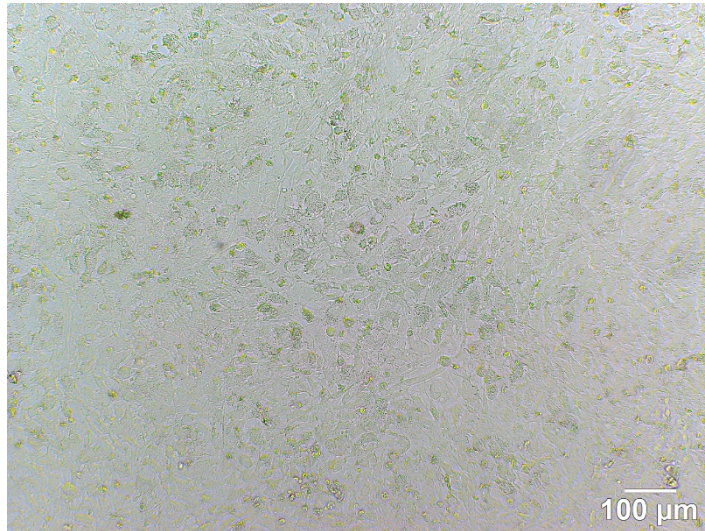

Figure 4B. Expression of GFP in NMCs at 72 h after lentivirus transfection  
( White Light)

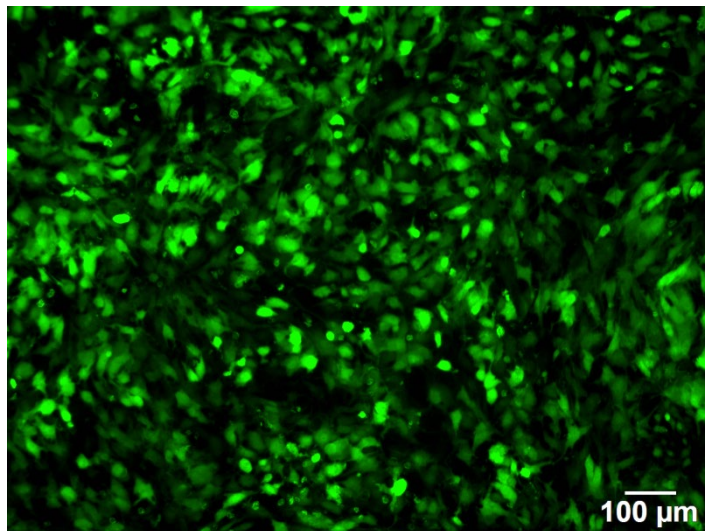

Figure 4B. Expression of GFP in NMCs at 72 h after lentivirus transfection  
(Green Light)
